# Supplementary material
Source: publisher site journal article supplement (https://www.dovepress.com/get_supplementary_file.php?f=392241.xlsx)
Supplement: Supplementary file 1 [file get_supplementary_file.php]

## Sheet: Supplementary Table
Supplementary Tables
Table S1 The minimum inhibitory concentrations of these isolates against cefiderocol and other antibiotics.
Table S2 The sequencing and assembly quality.
Table S3 All pairwise average nucleotide identity (ANI) values of 55 isolates.
Table S4 Mutations in genes potentially conferring resistance to cefiderocol.
Table S5 Related genes in “oxidoreductase activity”.
Table S6 189 differentially expressed genes were annotated based on KEGG database.
Table S7 The genes in the red module of WGCNA analysis
Table S8 The genes in the green module of WGCNA analysis

## Sheet: Table S1
Sample Name	Cefiderocol (mg/L)	Amikacin (mg/L)	Ciprofloxacin (mg/L)	Cefepime (mg/L)	Imipenem (mg/L)	Meropenem (mg/L)	Ceftazidime (mg/L)	Tigecycline (mg/L)	Piperacillin/tazobactam (mg/L)	Cefoperazone/sulbactam (mg/L)	Colistin (mg/L)
A1	128	128	32	128	128	64	128	0.125	128	128	0.5
A10	128	128	1	128	128	64	128	8	64	64	0.5
A11	128	128	1	128	128	64	128	1	128	128	0.25
A12	≥256	128	32	128	64	64	128	1	128	32	0.5
A13	≥256	128	64	128	128	64	128	1	128	128	0.5
A14	32	32	32	128	128	64	128	1	128	128	1
A16	128	128	2	＞128	128	64	128	0.125	128	128	1
A17	≥256	＞128	32	128	＞128	64	128	1	128	128	1
A18	128	128	32	128	32	32	128	1	64	128	0.5
A19	16	16	4	128	128	128	128	1	128	128	1
A2	128	128	16	128	128	64	128	0.25	128	128	0.5
A20	≥256	128	16	128	128	64	128	1	128	128	0.5
A21	64	128	0.5	128	128	64	128	0.5	128	128	0.5
A22	32	64	16	128	32	16	128	1	128	64	0.5
A23	64	128	64	128	128	64	128	1	128	128	2
A24	16	8	2	128	128	64	128	1	128	＞128	0.5
A25	128	＞128	32	128	128	64	128	1	128	128	1
A26	32	64	8	128	128	32	128	1	128	128	0.5
A27	64	128	16	128	128	64	128	2	128	128	0.5
A28	128	128	8	128	32	32	128	1	128	32	2
A29	128	128	64	128	128	16	128	1	128	16	0.5
A3	≥256	128	32	128	128	64	128	1	128	128	0.5
A30	64	128	32	128	128	64	128	0.25	128	64	1
A31	≥256	＞128	16	128	128	128	128	1	128	128	0.5
A32	128	128	8	128	128	64	128	1	128	128	0.5
A33	128	128	32	128	128	64	128	1	128	128	0.125
A34	64	128	32	128	128	64	64	1	64	128	0.5
A35	128	128	32	128	128	128	128	1	128	128	0.5
A36	≥256	16	8	128	32	16	128	1	128	64	0.5
A37	≥256	128	32	128	128	64	64	1	128	128	0.5
A38	64	128	16	128	128	64	128	1	128	128	0.125
A39	128	32	32	128	128	128	128	8	128	128	0.5
A4	≥256	＞128	32	128	128	128	128	1	128	＞128	0.25
A40	64	128	32	32	128	64	128	1	＞128	128	0.5
A41	64	128	32	128	128	64	128	1	128	＞128	0.5
A42	0.25	128	16	128	128	64	128	1	128	128	1
A43	16	128	8	128	128	64	128	1	128	128	2
A44	32	16	64	128	16	8	128	1	128	32	0.5
A45	32	128	16	128	128	64	128	0.125	128	128	0.5
A46	128	128	64	128	128	64	128	1	128	128	0.5
A47	64	32	16	128	128	16	128	1	＞128	128	1
A49	128	＞128	64	128	64	32	128	2	128	128	0.125
A5	0.06	64	8	＞128	128	64	128	0.5	128	128	0.5
A50	64	8	8	128	128	64	128	1	128	128	0.5
A51	64	128	64	128	128	64	＞128	1	128	128	1
A52	8	16	32	128	＞128	64	128	2	＞128	＞128	0.5
A54	0.125	128	64	64	64	16	128	1	128	128	0.5
A58	0.06	128	64	8	128	32	128	1	64	16	0.5
A6	≥256	64	16	128	128	64	128	0.125	128	128	0.5
A7	8	128	0.5	128	64	64	128	1	128	128	1
A74	0.5	8	64	128	128	128	128	2	128	128	0.5
A75	2	32	64	128	128	128	128	0.5	128	128	0.5
A79	0.5	4	64	128	128	128	128	1	128	128	0.5
A8	32	128	8	128	128	64	128	0.125	＞128	128	1
A81	0.125	4	64	128	128	128	128	0.5	＞128	16	0.5

## Sheet: Table S2
Sample Name	Raw Pair Reads	Raw Bases (bp)	Raw Q20 (%)	Raw Q30 (%)	Clean Pair Reads	Clean Single Reads	Clean Bases (bp)	Clean Q20(%)	Clean Q30(%)	Total Scaf No.	Total Bases in Scaf (bp)	Large Scaf No.	Large Scaf Bases(bp)	Largest Scaf Len(bp)	Scaf N50(bp)	Scaf N90(bp)	G+C(%)	N Rate(%)	Total Ctg No.	Total Bases in Ctg (bp)	Large Ctg No.	Large Ctg Bases(bp)	Largest Ctg Len(bp)	Ctg N50(bp)	Ctg N90(bp)	Depth	Completeness(%)
A1	4842321*2	1462380942	96.56	91.11	4772976*2	66748	1449845424	96.89	91.52	117	4014673	91	4000694	364340	136302	40874	39.12	0.006	178	4014401	112	3981445	304255	105539	26701	364.26	97.3
A10	3872618*2	1169530636	96.04	90.5	3744026*2	118346	1146909642	96.87	91.49	100	3913039	79	3901447	484180	194496	37675	38.89	0.007	138	3912730	100	3894312	483807	115451	26793	298.88	97.3
A11	3700852*2	1117657304	96.48	91.04	3629261*2	70056	1105064310	96.94	91.6	101	3847320	77	3834550	483492	194122	37776	38.99	0.008	143	3846982	93	3821561	432780	112897	26940	290.5	97.3
A12	4034144*2	1218311488	96.19	90.64	3931374*2	100638	1200381304	96.81	91.39	98	3844287	79	3835032	349719	140855	37628	39	0.005	137	3844063	102	3827606	349719	91473	26940	316.91	97.3
A13	3657009*2	1104416718	96.45	91	3583478*2	71291	1091511239	96.93	91.58	103	3915972	78	3901997	483992	194046	40654	38.91	0.006	138	3915717	99	3896103	433223	111977	30526	282.03	97.3
A14	3948144*2	1192339488	96.31	90.61	3883257*2	63213	1180852613	96.69	91.07	99	3846216	77	3834014	350105	153207	37745	39	0.009	138	3845844	99	3826120	280144	102677	26649	310	97.3
A16	3949924*2	1192877048	96.36	90.73	3881608*2	66707	1180727486	96.77	91.22	93	3913138	75	3903924	483359	194220	39246	38.91	0.007	128	3912859	94	3897100	482986	115415	27735	304.84	97.3
A17	3545514*2	1070745228	96.42	90.94	3478204*2	65572	1058802516	96.88	91.49	92	3846294	73	3835532	483527	194082	40654	39	0.007	128	3846007	92	3829352	483276	115409	31814	278.38	97.3
A18	3129076*2	944980952	96.34	90.73	3068867*2	58393	934391890	96.8	91.29	103	3911263	81	3899106	483073	194143	31814	38.9	0.005	138	3911036	97	3890666	432361	115429	29184	241.61	97.3
A19	3239835*2	978430170	96.45	90.88	3188603*2	49836	969383943	96.82	91.32	91	3912180	75	3904510	483640	194308	34636	38.89	0.006	128	3911920	98	3898587	432928	94225	26649	250.1	96.6
A2	4160378*2	1256434156	96.39	90.86	4085039*2	72186	1242975231	96.83	91.38	120	4080518	90	4064400	364540	167028	40723	39.03	0.008	168	4080168	108	4049640	364540	123939	26695	307.91	97.3
A20	3602578*2	1087978556	96.64	91.34	3537680*2	63522	1076897854	97.07	91.86	97	3847273	76	3835824	483455	194122	37748	39	0.007	142	3846971	97	3825563	483455	115980	30533	282.79	97.3
A21	4298901*2	1298268102	96.22	90.67	4194152*2	91985	1278883974	96.81	91.39	90	3913066	71	3903094	484100	193964	39278	38.89	0.009	134	3912679	95	3893848	432600	95503	26940	331.78	97.3
A22	4181526*2	1262820852	96.22	90.73	4078134*2	100985	1244914755	96.83	91.46	109	3912462	86	3898996	484361	134963	33459	38.91	0.009	153	3912107	110	3890564	433898	107305	26649	322.77	97.3
A23	3543001*2	1069986302	96.66	91.42	3480129*2	61208	1058969567	97.08	91.93	95	3913424	75	3901674	483092	193836	37770	38.9	0.009	144	3913034	99	3891233	432380	115425	27735	273.41	97.3
A24	4075113*2	1230684126	96.56	91.25	3998608*2	74706	1216955000	97.01	91.8	104	3915227	82	3903459	484036	194683	37665	38.9	0.007	152	3914938	106	3893991	433274	91872	26940	314.33	97.3
A25	4232447*2	1278198994	95.91	90.22	4107120*2	121788	1256551297	96.65	91.11	95	3901069	76	3891164	482648	140847	39276	38.91	0.01	134	3900670	101	3885538	431148	95514	26649	327.65	97.3
A26	4004285*2	1209294070	96.64	91.26	3944032*2	58815	1198649284	96.99	91.69	101	3914193	81	3902916	349783	153138	37745	38.91	0.012	149	3913699	109	3893384	280232	88367	26649	308.95	97.3
A27	3478665*2	1050556830	95.99	90	3410874*2	65058	1038656044	96.45	90.55	103	3906382	85	3897301	482905	134774	31814	38.91	0.003	134	3906233	97	3887086	369838	107305	26649	268.93	97.3
A28	3595424*2	1085818048	96.07	90.3	3518370*2	73739	1072422384	96.59	90.93	101	3912505	81	3902169	369111	140838	31814	38.9	0.006	137	3912265	101	3895316	369111	102679	27735	277.53	97.3
A29	3846462*2	1161631524	96.64	91.27	3788976*2	55941	1151275657	96.99	91.7	103	3915281	81	3904074	483514	195279	37758	38.91	0.007	143	3914978	97	3892148	483141	115425	27735	296.69	97.3
A3	3971177*2	1199295454	96.24	90.77	3860309*2	102152	1179822637	96.92	91.59	98	3849384	77	3838690	484014	194194	40730	39	0.006	134	3849150	94	3831228	433307	115447	31911	311.56	97.3
A30	3852542*2	1163467684	96.72	91.36	3798334*2	52907	1153865657	97.05	91.76	107	3907437	85	3895831	483645	134939	32081	38.91	0.006	147	3907201	103	3886594	432811	107305	30064	297.76	97.3
A31	3954709*2	1194322118	96.64	91.27	3899969*2	52736	1184212140	96.97	91.67	103	3914915	80	3902184	483628	194293	39222	38.91	0.007	148	3914620	99	3890330	433167	95491	27735	305.07	97.3
A32	4458851*2	1346573002	96.51	91.12	4384893*2	68832	1332666796	96.91	91.6	117	3852998	79	3829770	483982	162424	40738	38.98	0.01	164	3852582	96	3819060	483670	115447	30538	349.49	97.3
A33	4431988*2	1338460376	96.67	91.4	4364405*2	65241	1326094650	97.03	91.84	102	3845196	78	3831224	483206	193826	37746	38.99	0.008	139	3844867	98	3823909	482833	115425	27735	348.09	97.3
A34	3923403*2	1184867706	96.65	91.42	3846868*2	74970	1171473083	97.12	91.99	95	3833614	72	3820514	482934	166496	37332	38.98	0.006	139	3833353	93	3811876	482683	111908	30145	309.07	97.3
A35	3941029*2	1190190758	96.66	91.29	3883789*2	55816	1179704869	97	91.69	92	3900980	73	3890381	483803	194172	40654	38.91	0.007	127	3900706	89	3883152	483502	115428	26940	305.1	97.3
A36	4290466*2	1295720732	96.71	91.44	4228448*2	55249	1282569418	97.05	91.85	99	3844642	80	3834878	482154	140424	26545	38.9	0.012	139	3844150	102	3826481	481903	91777	20189	337.02	97.3
A37	4532533*2	1368824966	96.56	91.27	4439325*2	82997	1351552542	97.06	91.87	98	3899533	79	3889135	472310	134922	32807	38.91	0.002	136	3899439	100	3881577	472310	105602	23089	351.02	97.3
A38	3550104*2	1072131408	96.63	91.31	3494309*2	54136	1062279586	97.01	91.76	103	3970949	70	3953765	287238	140806	38555	38.96	0.008	142	3970607	88	3944531	287238	115151	28959	269.99	97.3
A39	4127994*2	1246654188	96.34	90.76	4047457*2	78863	1232532850	96.81	91.32	101	3843819	78	3831677	482819	194204	40654	39	0.007	135	3843539	94	3823406	431776	102680	27735	324.33	97.3
A4	4274928*2	1291028256	96.49	91.17	4183642*2	86012	1274349876	97.02	91.8	96	3846317	77	3836242	482973	194196	40654	39	0.009	138	3845937	95	3825839	482594	102680	31616	335.65	97.3
A40	3811006*2	1150923812	96.44	90.98	3739407*2	65107	1137585289	96.89	91.52	93	3843619	75	3834266	483273	194024	40658	38.99	0.006	124	3843350	93	3827303	432399	115400	30517	299.44	97.3
A41	4124458*2	1245586316	96.17	90.73	4017287*2	103534	1226682302	96.8	91.5	97	3848820	77	3838985	368871	194202	37316	39	0.004	135	3848639	98	3831789	368621	102681	26649	323.63	97.3
A42	4861468*2	1468163336	96.64	91.32	4785577*2	74025	1454659003	97.01	91.77	73	4032834	58	4025840	364638	148644	45546	39	0.005	100	4032632	71	4020288	308936	107784	42691	364.05	97.3
A43	3445088*2	1040416576	96.58	91.19	3384786*2	54884	1029163503	97	91.7	87	3905814	71	3897383	420780	181399	39259	38.87	0.005	125	3905581	94	3890722	395326	115439	26632	266.38	96.6
A44	4226316*2	1276347432	95.38	89.06	4115804*2	105504	1256089461	96.03	89.84	170	3964038	99	3928565	369711	132063	31804	39.06	0.051	239	3962006	115	3903489	349706	102677	26649	321.98	97.3
A45	3838111*2	1159109522	96.05	90.38	3752071*2	82369	1143711211	96.59	91.04	97	3901512	76	3890912	395872	155283	33773	38.87	0.007	130	3901220	97	3885788	369954	102679	26632	297.09	96.6
A46	3804713*2	1149023326	96.46	90.97	3739537*2	63709	1137364894	96.87	91.46	93	3898501	72	3887205	482642	194123	42692	38.9	0.006	129	3898242	92	3881199	482642	115425	27735	294.73	97.3
A47	3910218*2	1180885836	96.8	91.62	3850167*2	58627	1170155745	97.16	92.06	79	3810971	63	3803146	483672	132063	40693	39.01	0.007	108	3810670	80	3798486	433171	103913	29184	309.86	97.3
A49	3878893*2	1171425686	96.84	91.7	3817898*2	54698	1159897516	97.21	92.15	96	3833087	76	3821622	483250	193932	40261	39	0.009	131	3832715	96	3815631	432501	102681	26649	305.61	97.3
A5	3854271*2	1163989842	97.29	92.42	3806864*2	45903	1155255065	97.56	92.74	98	3910877	74	3898448	349685	140403	40689	38.9	0.008	138	3910527	95	3890368	282688	91818	28664	297.63	97.3
A50	3626493*2	1095200886	96.38	90.91	3556037*2	61993	1081763196	96.85	91.48	98	3844583	75	3832608	483607	194495	37628	39	0.007	135	3844313	98	3826784	432773	91473	26940	284.87	97.3
A51	3477763*2	1050284426	96.89	92.08	3373906*2	68363	1028032793	97.61	92.94	97	3841329	77	3829832	483612	194010	40704	38.99	0.01	134	3840915	98	3823179	432900	102681	27733	273.42	97.3
A52	3596987*2	1086290074	96.75	91.45	3543319*2	52553	1076801274	97.1	91.88	97	3844435	77	3833644	483574	194157	40654	39	0.002	133	3844347	95	3826456	483201	114515	26545	282.56	97.3
A54	4014395*2	1212347290	96.54	91.04	3961590*2	50714	1202660258	96.84	91.4	91	3951700	70	3940665	348655	169312	41810	38.86	0.006	126	3951427	86	3932438	346824	143647	28215	306.79	97.3
A58	3504789*2	1058446278	96.53	91.04	3454083*2	49316	1049376939	96.87	91.45	99	3966573	77	3955859	292283	116648	36638	38.98	0.012	140	3966066	102	3948310	286082	98558	25145	266.84	97.3
A6	3634446*2	1097602692	96.85	91.72	3583721*2	49450	1088600971	97.17	92.12	107	3883210	77	3867061	364177	194665	32780	39.03	0.008	152	3882872	88	3849054	364177	115448	26569	282.65	97.3
A7	5125887*2	1548017874	96.55	91.24	5024009*2	93740	1528478678	97.04	91.82	95	3863513	76	3853409	350083	140863	38089	38.89	0.011	136	3863080	99	3845351	294049	91473	28664	400.68	97.3
A74	2902295*2	876493090	97.36	92.82	2845025*2	44550	864736009	97.84	93.39	91	3908904	78	3902264	292837	110103	32779	38.84	0.006	127	3908665	101	3897780	292837	84339	23700	224.23	97.3
A75	3723464*2	1124486128	96.42	90.95	3656633*2	62791	1111554484	96.85	91.48	112	3960648	85	3947540	351327	126074	26649	38.82	0.005	166	3960444	107	3934316	285225	98556	23028	283.91	97.3
A79	3696455*2	1116329410	96.61	91.15	3646498*2	48609	1107393216	96.93	91.53	86	3953955	76	3949047	293096	97189	34228	38.83	0.007	125	3953678	99	3941847	250583	71862	25843	282.33	97.3
A8	4702369*2	1420115438	96.53	91.17	4607021*2	93610	1403595885	97.02	91.77	101	3917287	82	3907230	350386	134961	33452	38.9	0.008	147	3916963	109	3899311	280136	88524	26649	362.53	97.3
A81	3778410*2	1141079820	96.37	90.7	3720805*2	56164	1130804069	96.73	91.13	104	4007952	82	3996420	364489	109855	32779	38.89	0.01	154	4007536	104	3983322	317358	94833	26309	284.7	97.3

## Sheet: Table S3
Isolates	A10	A14	A19	A22	A26	A2	A33	A37	A40	A44	A49	A52	A6	A7	A11	A16	A1	A23	A27	A30	A34	A38	A41	A45	A4	A54	A74	A81	A12	A17	A20	A24	A28	A31	A35	A39	A42	A46	A50	A58	A75	A8	A13	A18	A21	A25	A29	A32	A36
A10	100	99.9948	99.9838	99.9868	99.9905	99.6318	99.9952	99.9873	99.9954	99.986	99.9884	99.9926	99.9191	99.9845	99.9904	99.9928	99.6321	99.9854	99.9876	99.9908	99.9937	99.8727	99.9901	99.6122	99.991	99.7814	99.7397	99.8624	99.9939	99.9905	99.994	99.9939	99.9921	99.9956	99.9928	99.9877	99.8144	99.9923	99.9952	99.8301	99.5514	99.9904	99.9922	99.9933	99.9825	99.9876	99.9926	99.9896	99.9805
A14	99.9948	100	99.9913	99.9848	99.9922	99.6101	99.9918	99.9791	99.9941	99.9781	99.9895	99.9822	99.902	99.9793	99.9919	99.9824	99.6151	99.9942	99.9775	99.9903	99.9872	99.8626	99.9926	99.6065	99.9915	99.779	99.8068	99.8631	99.9939	99.993	99.9827	99.9899	99.9911	99.994	99.9929	99.9853	99.818	99.9917	99.9915	99.8104	99.6275	99.9926	99.9936	99.9808	99.9942	99.992	99.9929	99.9934	99.9837
A19	99.9838	99.9913	100	99.9914	99.9903	99.6254	99.991	99.973	99.9911	99.9838	99.9763	99.9894	99.8792	99.9815	99.986	99.9791	99.6356	99.9927	99.9817	99.9919	99.9895	99.8563	99.991	99.6004	99.9879	99.7677	99.7103	99.8471	99.9834	99.9904	99.9935	99.9867	99.9876	99.9905	99.9814	99.9891	99.7954	99.979	99.9901	99.8144	99.53	99.9904	99.9906	99.9885	99.9904	99.9754	99.994	99.9893	99.9756
A22	99.9868	99.9848	99.9914	100	99.9831	99.6409	99.9902	99.9833	99.9914	99.9855	99.9866	99.9879	99.903	99.9874	99.9879	99.9864	99.6243	99.9936	99.9843	99.9898	99.9906	99.873	99.9909	99.612	99.9912	99.7892	99.7553	99.8732	99.9851	99.9897	99.9924	99.9887	99.9797	99.9904	99.9896	99.9854	99.8104	99.9905	99.9898	99.8269	99.5665	99.9879	99.9919	99.9867	99.9843	99.987	99.9927	99.9876	99.9808
A26	99.9905	99.9922	99.9903	99.9831	100	99.6146	99.9858	99.9858	99.9932	99.9875	99.9901	99.9904	99.9081	99.986	99.9848	99.9831	99.6203	99.9883	99.984	99.9828	99.9885	99.87	99.9882	99.6044	99.987	99.7842	99.72	99.8462	99.9905	99.9907	99.9914	99.9897	99.9898	99.992	99.9924	99.9835	99.8245	99.988	99.9926	99.8113	99.5726	99.9886	99.9874	99.9908	99.9915	99.9904	99.9886	99.9912	99.9742
A2	99.6318	99.6101	99.6254	99.6409	99.6146	100	99.6333	99.6286	99.6146	99.6282	99.6136	99.5966	99.6735	99.6052	99.6175	99.6064	99.9856	99.6253	99.6157	99.621	99.6156	99.6561	99.6075	99.3457	99.6185	99.6013	99.4847	99.5524	99.6169	99.6159	99.6277	99.631	99.6153	99.6294	99.6275	99.6084	99.6743	99.6344	99.6142	99.6092	99.5322	99.6307	99.6403	99.6312	99.6384	99.6063	99.6346	99.6257	99.608
A33	99.9952	99.9918	99.991	99.9902	99.9858	99.6333	100	99.9876	99.9948	99.9904	99.9904	99.9927	99.8933	99.9839	99.9932	99.9859	99.642	99.9944	99.9872	99.9878	99.9886	99.8716	99.9945	99.6044	99.9957	99.7845	99.8198	99.8362	99.9923	99.9938	99.9935	99.9916	99.9897	99.9937	99.9938	99.9921	99.8193	99.9914	99.9951	99.8098	99.6273	99.9947	99.9928	99.9928	99.9959	99.9929	99.9946	99.9918	99.9787
A37	99.9873	99.9791	99.973	99.9833	99.9858	99.6286	99.9876	100	99.9828	99.9845	99.9836	99.9758	99.8739	99.9808	99.9884	99.9738	99.6242	99.9824	99.9809	99.9847	99.9806	99.8793	99.9839	99.609	99.9842	99.7725	99.7244	99.8739	99.9806	99.9839	99.9733	99.9882	99.9811	99.9846	99.9855	99.9785	99.7959	99.9857	99.9847	99.816	99.5723	99.98	99.9838	99.9883	99.9657	99.9857	99.9859	99.9888	99.9832
A40	99.9954	99.9941	99.9911	99.9914	99.9932	99.6146	99.9948	99.9828	100	99.9888	99.9858	99.983	99.8995	99.9875	99.9922	99.9862	99.634	99.9954	99.9854	99.9927	99.9934	99.8675	99.994	99.6026	99.9959	99.7663	99.7991	99.8372	99.9906	99.994	99.9788	99.9901	99.9915	99.9957	99.9897	99.9924	99.8194	99.9883	99.9957	99.7986	99.631	99.9943	99.9944	99.9902	99.9961	99.9856	99.9947	99.9944	99.9784
A44	99.986	99.9781	99.9838	99.9855	99.9875	99.6282	99.9904	99.9845	99.9888	100	99.9863	99.9731	99.886	99.979	99.9889	99.976	99.6299	99.9863	99.9883	99.9886	99.9895	99.8755	99.9882	99.6136	99.9879	99.7727	99.7169	99.8246	99.9855	99.9871	99.9766	99.9889	99.9809	99.9833	99.9874	99.9825	99.7914	99.9858	99.9892	99.797	99.5511	99.9861	99.9862	99.9903	99.9754	99.9905	99.9906	99.9896	99.9833
A49	99.9884	99.9895	99.9763	99.9866	99.9901	99.6136	99.9904	99.9836	99.9858	99.9863	100	99.9791	99.8896	99.9789	99.993	99.9779	99.6225	99.9855	99.9814	99.9845	99.988	99.8777	99.9864	99.6093	99.9897	99.7801	99.8045	99.845	99.9877	99.9882	99.9783	99.9936	99.9929	99.9894	99.991	99.9847	99.7979	99.9873	99.9886	99.8369	99.6494	99.988	99.9872	99.9906	99.9774	99.9911	99.9862	99.9915	99.9826
A52	99.9926	99.9822	99.9894	99.9879	99.9904	99.5966	99.9927	99.9758	99.983	99.9731	99.9791	100	99.8852	99.9711	99.9852	99.9884	99.6223	99.9913	99.9837	99.9866	99.9856	99.8485	99.9892	99.617	99.9847	99.7494	99.794	99.8597	99.9903	99.9859	99.9928	99.9828	99.9834	99.9916	99.9935	99.9796	99.772	99.9897	99.9935	99.7835	99.6383	99.9819	99.9912	99.9827	99.9865	99.9759	99.9908	99.9885	99.9711
A6	99.9191	99.902	99.8792	99.903	99.9081	99.6735	99.8933	99.8739	99.8995	99.886	99.8896	99.8852	100	99.8864	99.8861	99.8875	99.6544	99.9082	99.8814	99.8592	99.8967	99.979	99.8956	99.5216	99.8925	99.8256	99.8255	99.8575	99.8784	99.8902	99.8999	99.918	99.9033	99.8939	99.883	99.9013	99.801	99.8936	99.8976	99.8904	99.7001	99.9146	99.8984	99.8953	99.9116	99.8952	99.8795	99.8763	99.857
A7	99.9845	99.9793	99.9815	99.9874	99.986	99.6052	99.9839	99.9808	99.9875	99.979	99.9789	99.9711	99.8864	100	99.9878	99.9778	99.6338	99.9859	99.97	99.9849	99.9906	99.8768	99.9827	99.6112	99.9878	99.7661	99.74	99.8635	99.9798	99.9843	99.9738	99.9841	99.9741	99.9855	99.9814	99.9795	99.8015	99.9829	99.9861	99.8047	99.5315	99.9871	99.9876	99.9814	99.9775	99.9845	99.9858	99.9875	99.9785
A11	99.9904	99.9919	99.986	99.9879	99.9848	99.6175	99.9932	99.9884	99.9922	99.9889	99.993	99.9852	99.8861	99.9878	100	99.9892	99.6265	99.9906	99.9893	99.9882	99.9924	99.8697	99.9905	99.6038	99.9923	99.7683	99.8183	99.827	99.9882	99.9908	99.9916	99.9922	99.9917	99.9929	99.9917	99.9861	99.7917	99.9898	99.9921	99.799	99.6347	99.9876	99.9883	99.9914	99.9882	99.99	99.9883	99.9908	99.9891
A16	99.9928	99.9824	99.9791	99.9864	99.9831	99.6064	99.9859	99.9738	99.9862	99.976	99.9779	99.9884	99.8875	99.9778	99.9892	100	99.6291	99.9918	99.9791	99.9859	99.9847	99.8659	99.9738	99.6038	99.9874	99.7583	99.7465	99.8302	99.977	99.9885	99.9802	99.983	99.9713	99.9862	99.9845	99.9838	99.7853	99.9744	99.989	99.7746	99.5674	99.9839	99.9884	99.9815	99.9904	99.976	99.9877	99.9866	99.9719
A1	99.6321	99.6151	99.6356	99.6243	99.6203	99.9856	99.642	99.6242	99.634	99.6299	99.6225	99.6223	99.6544	99.6338	99.6265	99.6291	100	99.626	99.6308	99.6302	99.6316	99.6544	99.6389	99.3439	99.6325	99.6018	99.5652	99.5778	99.6493	99.6337	99.6239	99.6449	99.631	99.6193	99.637	99.6255	99.6746	99.635	99.6341	99.6021	99.5943	99.6312	99.6268	99.6292	99.6382	99.6188	99.6431	99.6265	99.6199
A23	99.9854	99.9942	99.9927	99.9936	99.9883	99.6253	99.9944	99.9824	99.9954	99.9863	99.9855	99.9913	99.9082	99.9859	99.9906	99.9918	99.626	100	99.9838	99.9928	99.9948	99.8781	99.9923	99.6067	99.9914	99.7661	99.7329	99.8473	99.9887	99.9918	99.9908	99.9917	99.9932	99.994	99.9916	99.9903	99.8175	99.9898	99.9936	99.8257	99.5456	99.9952	99.9948	99.9913	99.9957	99.9879	99.9953	99.9911	99.9845
A27	99.9876	99.9775	99.9817	99.9843	99.984	99.6157	99.9872	99.9809	99.9854	99.9883	99.9814	99.9837	99.8814	99.97	99.9893	99.9791	99.6308	99.9838	100	99.9893	99.9853	99.8581	99.9844	99.6225	99.9874	99.7745	99.726	99.84	99.985	99.9804	99.9892	99.9832	99.9762	99.9874	99.9864	99.9823	99.7947	99.984	99.9869	99.8019	99.5386	99.9804	99.9801	99.9889	99.9736	99.9823	99.9894	99.986	99.9819
A30	99.9908	99.9903	99.9919	99.9898	99.9828	99.621	99.9878	99.9847	99.9927	99.9886	99.9845	99.9866	99.8592	99.9849	99.9882	99.9859	99.6302	99.9928	99.9893	100	99.9934	99.8528	99.9909	99.6059	99.9899	99.7457	99.7471	99.8404	99.9839	99.9896	99.99	99.9876	99.9856	99.9914	99.991	99.9861	99.7994	99.9914	99.9915	99.7965	99.5602	99.9904	99.991	99.9883	99.9914	99.9882	99.9949	99.9877	99.9854
A34	99.9937	99.9872	99.9895	99.9906	99.9885	99.6156	99.9886	99.9806	99.9934	99.9895	99.988	99.9856	99.8967	99.9906	99.9924	99.9847	99.6316	99.9948	99.9853	99.9934	100	99.8666	99.9885	99.6096	99.9955	99.7806	99.8348	99.8355	99.9911	99.9864	99.9944	99.9917	99.9888	99.9911	99.9906	99.9894	99.7888	99.985	99.9943	99.8182	99.6443	99.9902	99.9923	99.9878	99.9885	99.9826	99.9939	99.9924	99.9879
A38	99.8727	99.8626	99.8563	99.873	99.87	99.6561	99.8716	99.8793	99.8675	99.8755	99.8777	99.8485	99.979	99.8768	99.8697	99.8659	99.6544	99.8781	99.8581	99.8528	99.8666	100	99.8759	99.5307	99.8718	99.8468	99.762	99.8594	99.8578	99.855	99.8684	99.8792	99.8708	99.8606	99.8727	99.87	99.8173	99.8784	99.8761	99.876	99.5752	99.867	99.8636	99.8555	99.8632	99.874	99.8661	99.8686	99.8627
A41	99.9901	99.9926	99.991	99.9909	99.9882	99.6075	99.9945	99.9839	99.994	99.9882	99.9864	99.9892	99.8956	99.9827	99.9905	99.9738	99.6389	99.9923	99.9844	99.9909	99.9885	99.8759	100	99.608	99.9924	99.766	99.8275	99.8603	99.9899	99.9945	99.992	99.991	99.9915	99.9872	99.9933	99.9917	99.8004	99.9921	99.994	99.842	99.621	99.9897	99.9929	99.9881	99.9913	99.9885	99.9955	99.9916	99.9747
A45	99.6122	99.6065	99.6004	99.612	99.6044	99.3457	99.6044	99.609	99.6026	99.6136	99.6093	99.617	99.5216	99.6112	99.6038	99.6038	99.3439	99.6067	99.6225	99.6059	99.6096	99.5307	99.608	100	99.6046	99.4821	99.3493	99.5188	99.6145	99.6047	99.6037	99.622	99.6121	99.6263	99.6164	99.6174	99.5279	99.6127	99.6007	99.4532	99.2829	99.6095	99.6278	99.6141	99.6027	99.6049	99.6146	99.616	99.5958
A4	99.991	99.9915	99.9879	99.9912	99.987	99.6185	99.9957	99.9842	99.9959	99.9879	99.9897	99.9847	99.8925	99.9878	99.9923	99.9874	99.6325	99.9914	99.9874	99.9899	99.9955	99.8718	99.9924	99.6046	100	99.7711	99.8443	99.8647	99.9907	99.9919	99.9935	99.9913	99.9902	99.9943	99.9942	99.9865	99.8011	99.9909	99.9955	99.8077	99.6239	99.9959	99.9942	99.9891	99.9916	99.9907	99.9951	99.9912	99.9857
A54	99.7814	99.779	99.7677	99.7892	99.7842	99.6013	99.7845	99.7725	99.7663	99.7727	99.7801	99.7494	99.8256	99.7661	99.7683	99.7583	99.6018	99.7661	99.7745	99.7457	99.7806	99.8468	99.766	99.4821	99.7711	100	99.6905	99.8097	99.7715	99.7634	99.7789	99.7862	99.7784	99.782	99.789	99.7791	99.8347	99.7818	99.7855	99.8499	99.6057	99.7806	99.7668	99.7746	99.7793	99.7724	99.7852	99.7576	99.7681
A74	99.7397	99.8068	99.7103	99.7553	99.72	99.4847	99.8198	99.7244	99.7991	99.7169	99.8045	99.794	99.8255	99.74	99.8183	99.7465	99.5652	99.7329	99.726	99.7471	99.8348	99.762	99.8275	99.3493	99.8443	99.6905	100	99.7425	99.8163	99.8357	99.8252	99.7086	99.7301	99.7563	99.7393	99.8109	99.6673	99.7567	99.8224	99.8499	99.685	99.7293	99.7413	99.7335	99.7421	99.7119	99.7537	99.8109	99.732
A81	99.8624	99.8631	99.8471	99.8732	99.8462	99.5524	99.8362	99.8739	99.8372	99.8246	99.845	99.8597	99.8575	99.8635	99.827	99.8302	99.5778	99.8473	99.84	99.8404	99.8355	99.8594	99.8603	99.5188	99.8647	99.8097	99.7425	100	99.8471	99.843	99.8656	99.853	99.8642	99.8588	99.8756	99.8474	99.7509	99.8429	99.8392	99.9142	99.5298	99.8621	99.8682	99.8403	99.8495	99.8573	99.8354	99.831	99.8531
A12	99.9939	99.9939	99.9834	99.9851	99.9905	99.6169	99.9923	99.9806	99.9906	99.9855	99.9877	99.9903	99.8784	99.9798	99.9882	99.977	99.6493	99.9887	99.985	99.9839	99.9911	99.8578	99.9899	99.6145	99.9907	99.7715	99.8163	99.8471	100	99.9891	99.9909	99.992	99.9926	99.9914	99.9919	99.99	99.7937	99.9913	99.9911	99.8138	99.6343	99.9908	99.9904	99.9907	99.9862	99.9867	99.9884	99.9869	99.9715
A17	99.9905	99.993	99.9904	99.9897	99.9907	99.6159	99.9938	99.9839	99.994	99.9871	99.9882	99.9859	99.8902	99.9843	99.9908	99.9885	99.6337	99.9918	99.9804	99.9896	99.9864	99.855	99.9945	99.6047	99.9919	99.7634	99.8357	99.843	99.9891	100	99.9921	99.9907	99.9892	99.9907	99.9912	99.9891	99.7915	99.9917	99.993	99.807	99.636	99.9919	99.9942	99.9894	99.9889	99.9899	99.9937	99.9908	99.9735
A20	99.994	99.9827	99.9935	99.9924	99.9914	99.6277	99.9935	99.9733	99.9788	99.9766	99.9783	99.9928	99.8999	99.9738	99.9916	99.9802	99.6239	99.9908	99.9892	99.99	99.9944	99.8684	99.992	99.6037	99.9935	99.7789	99.8252	99.8656	99.9909	99.9921	100	99.9787	99.9789	99.9942	99.9921	99.9742	99.809	99.9939	99.9925	99.8149	99.6519	99.982	99.9878	99.9806	99.9917	99.9796	99.9947	99.9938	99.9719
A24	99.9939	99.9899	99.9867	99.9887	99.9897	99.631	99.9916	99.9882	99.9901	99.9889	99.9936	99.9828	99.918	99.9841	99.9922	99.983	99.6449	99.9917	99.9832	99.9876	99.9917	99.8792	99.991	99.622	99.9913	99.7862	99.7086	99.853	99.992	99.9907	99.9787	100	99.9943	99.9898	99.9921	99.9925	99.8072	99.9884	99.9907	99.8264	99.5571	99.989	99.9913	99.9898	99.9897	99.9906	99.9893	99.9938	99.9886
A28	99.9921	99.9911	99.9876	99.9797	99.9898	99.6153	99.9897	99.9811	99.9915	99.9809	99.9929	99.9834	99.9033	99.9741	99.9917	99.9713	99.631	99.9932	99.9762	99.9856	99.9888	99.8708	99.9915	99.6121	99.9902	99.7784	99.7301	99.8642	99.9926	99.9892	99.9789	99.9943	100	99.9893	99.9903	99.9902	99.8124	99.9893	99.9895	99.7956	99.5621	99.9858	99.9883	99.9819	99.9872	99.9935	99.9884	99.9932	99.9858
A31	99.9956	99.994	99.9905	99.9904	99.992	99.6294	99.9937	99.9846	99.9957	99.9833	99.9894	99.9916	99.8939	99.9855	99.9929	99.9862	99.6193	99.994	99.9874	99.9914	99.9911	99.8606	99.9872	99.6263	99.9943	99.782	99.7563	99.8588	99.9914	99.9907	99.9942	99.9898	99.9893	100	99.9924	99.989	99.8051	99.9907	99.9945	99.7899	99.5536	99.9921	99.9925	99.9901	99.9955	99.9882	99.9931	99.9934	99.9836
A35	99.9928	99.9929	99.9814	99.9896	99.9924	99.6275	99.9938	99.9855	99.9897	99.9874	99.991	99.9935	99.883	99.9814	99.9917	99.9845	99.637	99.9916	99.9864	99.991	99.9906	99.8727	99.9933	99.6164	99.9942	99.789	99.7393	99.8756	99.9919	99.9912	99.9921	99.9921	99.9903	99.9924	100	99.9915	99.8217	99.9876	99.9944	99.8118	99.5517	99.9926	99.9933	99.9906	99.9876	99.9899	99.9939	99.9927	99.9891
A39	99.9877	99.9853	99.9891	99.9854	99.9835	99.6084	99.9921	99.9785	99.9924	99.9825	99.9847	99.9796	99.9013	99.9795	99.9861	99.9838	99.6255	99.9903	99.9823	99.9861	99.9894	99.87	99.9917	99.6174	99.9865	99.7791	99.8109	99.8474	99.99	99.9891	99.9742	99.9925	99.9902	99.989	99.9915	100	99.8207	99.9892	99.9921	99.8061	99.6185	99.9864	99.9916	99.9919	99.9831	99.9807	99.9908	99.987	99.983
A42	99.8144	99.818	99.7954	99.8104	99.8245	99.6743	99.8193	99.7959	99.8194	99.7914	99.7979	99.772	99.801	99.8015	99.7917	99.7853	99.6746	99.8175	99.7947	99.7994	99.7888	99.8173	99.8004	99.5279	99.8011	99.8347	99.6673	99.7509	99.7937	99.7915	99.809	99.8072	99.8124	99.8051	99.8217	99.8207	100	99.7995	99.8187	99.799	99.66	99.803	99.8219	99.7869	99.8025	99.8186	99.7985	99.7901	99.811
A46	99.9923	99.9917	99.979	99.9905	99.988	99.6344	99.9914	99.9857	99.9883	99.9858	99.9873	99.9897	99.8936	99.9829	99.9898	99.9744	99.635	99.9898	99.984	99.9914	99.985	99.8784	99.9921	99.6127	99.9909	99.7818	99.7567	99.8429	99.9913	99.9917	99.9939	99.9884	99.9893	99.9907	99.9876	99.9892	99.7995	100	99.9903	99.801	99.5532	99.9907	99.9908	99.9904	99.9842	99.9923	99.9913	99.9924	99.9767
A50	99.9952	99.9915	99.9901	99.9898	99.9926	99.6142	99.9951	99.9847	99.9957	99.9892	99.9886	99.9935	99.8976	99.9861	99.9921	99.989	99.6341	99.9936	99.9869	99.9915	99.9943	99.8761	99.994	99.6007	99.9955	99.7855	99.8224	99.8392	99.9911	99.993	99.9925	99.9907	99.9895	99.9945	99.9944	99.9921	99.8187	99.9903	100	99.8131	99.6451	99.994	99.994	99.9909	99.995	99.9922	99.9942	99.9931	99.9884
A58	99.8301	99.8104	99.8144	99.8269	99.8113	99.6092	99.8098	99.816	99.7986	99.797	99.8369	99.7835	99.8904	99.8047	99.799	99.7746	99.6021	99.8257	99.8019	99.7965	99.8182	99.876	99.842	99.4532	99.8077	99.8499	99.8499	99.9142	99.8138	99.807	99.8149	99.8264	99.7956	99.7899	99.8118	99.8061	99.799	99.801	99.8131	100	99.6965	99.8089	99.805	99.7995	99.8356	99.8059	99.829	99.8079	99.8115
A75	99.5514	99.6275	99.53	99.5665	99.5726	99.5322	99.6273	99.5723	99.631	99.5511	99.6494	99.6383	99.7001	99.5315	99.6347	99.5674	99.5943	99.5456	99.5386	99.5602	99.6443	99.5752	99.621	99.2829	99.6239	99.6057	99.685	99.5298	99.6343	99.636	99.6519	99.5571	99.5621	99.5536	99.5517	99.6185	99.66	99.5532	99.6451	99.6965	100	99.5509	99.5435	99.5555	99.5648	99.5671	99.5522	99.6212	99.5706
A8	99.9904	99.9926	99.9904	99.9879	99.9886	99.6307	99.9947	99.98	99.9943	99.9861	99.988	99.9819	99.9146	99.9871	99.9876	99.9839	99.6312	99.9952	99.9804	99.9904	99.9902	99.867	99.9897	99.6095	99.9959	99.7806	99.7293	99.8621	99.9908	99.9919	99.982	99.989	99.9858	99.9921	99.9926	99.9864	99.803	99.9907	99.994	99.8089	99.5509	100	99.9941	99.9858	99.9925	99.9868	99.9931	99.9908	99.9816
A13	99.9922	99.9936	99.9906	99.9919	99.9874	99.6403	99.9928	99.9838	99.9944	99.9862	99.9872	99.9912	99.8984	99.9876	99.9883	99.9884	99.6268	99.9948	99.9801	99.991	99.9923	99.8636	99.9929	99.6278	99.9942	99.7668	99.7413	99.8682	99.9904	99.9942	99.9878	99.9913	99.9883	99.9925	99.9933	99.9916	99.8219	99.9908	99.994	99.805	99.5435	99.9941	100	99.9865	99.9935	99.9886	99.9939	99.9911	99.9814
A18	99.9933	99.9808	99.9885	99.9867	99.9908	99.6312	99.9928	99.9883	99.9902	99.9903	99.9906	99.9827	99.8953	99.9814	99.9914	99.9815	99.6292	99.9913	99.9889	99.9883	99.9878	99.8555	99.9881	99.6141	99.9891	99.7746	99.7335	99.8403	99.9907	99.9894	99.9806	99.9898	99.9819	99.9901	99.9906	99.9919	99.7869	99.9904	99.9909	99.7995	99.5555	99.9858	99.9865	100	99.9797	99.99	99.9898	99.9901	99.9803
A21	99.9825	99.9942	99.9904	99.9843	99.9915	99.6384	99.9959	99.9657	99.9961	99.9754	99.9774	99.9865	99.9116	99.9775	99.9882	99.9904	99.6382	99.9957	99.9736	99.9914	99.9885	99.8632	99.9913	99.6027	99.9916	99.7793	99.7421	99.8495	99.9862	99.9889	99.9917	99.9897	99.9872	99.9955	99.9876	99.9831	99.8025	99.9842	99.995	99.8356	99.5648	99.9925	99.9935	99.9797	100	99.9796	99.9946	99.9883	99.9699
A25	99.9876	99.992	99.9754	99.987	99.9904	99.6063	99.9929	99.9857	99.9856	99.9905	99.9911	99.9759	99.8952	99.9845	99.99	99.976	99.6188	99.9879	99.9823	99.9882	99.9826	99.874	99.9885	99.6049	99.9907	99.7724	99.7119	99.8573	99.9867	99.9899	99.9796	99.9906	99.9935	99.9882	99.9899	99.9807	99.8186	99.9923	99.9922	99.8059	99.5671	99.9868	99.9886	99.99	99.9796	100	99.9894	99.9917	99.9781
A29	99.9926	99.9929	99.994	99.9927	99.9886	99.6346	99.9946	99.9859	99.9947	99.9906	99.9862	99.9908	99.8795	99.9858	99.9883	99.9877	99.6431	99.9953	99.9894	99.9949	99.9939	99.8661	99.9955	99.6146	99.9951	99.7852	99.7537	99.8354	99.9884	99.9937	99.9947	99.9893	99.9884	99.9931	99.9939	99.9908	99.7985	99.9913	99.9942	99.829	99.5522	99.9931	99.9939	99.9898	99.9946	99.9894	100	99.9903	99.9873
A32	99.9896	99.9934	99.9893	99.9876	99.9912	99.6257	99.9918	99.9888	99.9944	99.9896	99.9915	99.9885	99.8763	99.9875	99.9908	99.9866	99.6265	99.9911	99.986	99.9877	99.9924	99.8686	99.9916	99.616	99.9912	99.7576	99.8109	99.831	99.9869	99.9908	99.9938	99.9938	99.9932	99.9934	99.9927	99.987	99.7901	99.9924	99.9931	99.8079	99.6212	99.9908	99.9911	99.9901	99.9883	99.9917	99.9903	100	99.9894
A36	99.9805	99.9837	99.9756	99.9808	99.9742	99.608	99.9787	99.9832	99.9784	99.9833	99.9826	99.9711	99.857	99.9785	99.9891	99.9719	99.6199	99.9845	99.9819	99.9854	99.9879	99.8627	99.9747	99.5958	99.9857	99.7681	99.732	99.8531	99.9715	99.9735	99.9719	99.9886	99.9858	99.9836	99.9891	99.983	99.811	99.9767	99.9884	99.8115	99.5706	99.9816	99.9814	99.9803	99.9699	99.9781	99.9873	99.9894	100
A3	99.9946	99.9929	99.9908	99.9907	99.9914	99.6415	99.9942	99.9796	99.9937	99.9867	99.989	99.9926	99.9154	99.9883	99.993	99.9874	99.6399	99.9946	99.9861	99.992	99.9936	99.8728	99.9939	99.602	99.9935	99.7773	99.8359	99.8411	99.9921	99.9913	99.9921	99.9903	99.9916	99.9937	99.9935	99.9911	99.8115	99.9909	99.9938	99.8073	99.6422	99.993	99.9932	99.9885	99.9946	99.9906	99.9933	99.9934	99.9866
A43	99.6018	99.6008	99.5932	99.6078	99.6022	99.3295	99.5968	99.5897	99.5922	99.6019	99.5978	99.6103	99.5293	99.5865	99.5952	99.6	99.3275	99.598	99.6054	99.6077	99.6031	99.5204	99.5997	99.9891	99.5854	99.49	99.3503	99.4983	99.6159	99.5934	99.6022	99.6238	99.6152	99.6171	99.6068	99.6006	99.5263	99.6042	99.5972	99.4404	99.3117	99.605	99.6067	99.6107	99.5978	99.5862	99.609	99.6012	99.5902
A47	99.9838	99.9688	99.9756	99.9762	99.9706	99.6093	99.9784	99.9424	99.9545	99.9519	99.9674	99.9697	99.8545	99.9494	99.9733	99.9732	99.6431	99.9767	99.9783	99.979	99.9787	99.821	99.9818	99.6017	99.9751	99.7401	99.7509	99.8557	99.9749	99.9657	99.9875	99.9753	99.9669	99.9703	99.9852	99.9703	99.7635	99.9903	99.9753	99.7727	99.5714	99.9745	99.961	99.9671	99.9716	99.962	99.9758	99.9729	99.9708
A51	99.9955	99.9942	99.9933	99.9894	99.9932	99.6169	99.9955	99.9865	99.9956	99.9893	99.9887	99.9942	99.8935	99.9858	99.9922	99.9894	99.6471	99.9957	99.9855	99.9913	99.9936	99.8719	99.9956	99.6211	99.9957	99.7891	99.8311	99.8392	99.9906	99.9948	99.9929	99.9925	99.991	99.9918	99.9949	99.9927	99.8089	99.9919	99.996	99.8104	99.6382	99.995	99.9953	99.9903	99.9943	99.9928	99.9943	99.9933	99.9799
A5	99.9932	99.992	99.9884	99.988	99.9876	99.6356	99.9913	99.9818	99.9927	99.9832	99.9835	99.9884	99.9109	99.985	99.9899	99.988	99.6551	99.9907	99.9894	99.989	99.993	99.8854	99.9869	99.6126	99.9922	99.7826	99.7519	99.8299	99.9901	99.9864	99.992	99.9921	99.9894	99.9914	99.9929	99.9801	99.8192	99.9823	99.9935	99.8398	99.5962	99.9895	99.9886	99.9904	99.9906	99.9803	99.9934	99.9877	99.979
A79	99.6719	99.7202	99.6423	99.6583	99.6673	99.4854	99.7191	99.6773	99.7224	99.6531	99.7492	99.7136	99.7696	99.674	99.7356	99.6496	99.5665	99.6487	99.6466	99.6747	99.7283	99.7176	99.748	99.3942	99.7392	99.7846	99.8422	99.694	99.725	99.7437	99.7455	99.642	99.6547	99.6616	99.6665	99.7146	99.7042	99.6724	99.7381	99.7376	99.7215	99.6634	99.6578	99.6229	99.6795	99.6834	99.6633	99.7192	99.6831
[truncated: 6 more columns]

## Sheet: Table S4
Isolates	ST	β-lactamase gene	MIC(mg/L)	PBP3	TonB-ExbB-ExbD
				FtsI	ExbD	gene-KIH05_03240
A42	2	blaTEM, blaADC, blaOXA-51	0.25	Ala515Thr	/	Gly216Val
A74	2	blaOXA-23, blaTEM, blaADC, blaOXA-51	0.5	Ala515Val	/	Gly216Val
A75	2	blaOXA-23, blaADC, blaOXA-51	2	Ala515Val	Met25Thr	Gly216Val
A79	2	blaOXA-23, blaTEM, blaADC, blaOXA-51	0.25	Ala515Val	/	Gly216Val
A6	2	blaPER, blaADC, blaOXA-51	≥256	/	Met25Thr	Gly216Val
A38	2	blaPER, blaADC, blaOXA-51	64	/	Met25Thr	Gly216Val
A43	104	blaPER, blaOXA-23, blaTEM, blaADC, blaOXA-51	16	/	/	Asn489Asp
A45	104	blaPER, blaOXA-23, blaTEM, blaADC, blaOXA-51	32	/	/	Asn489Asp

## Sheet: Table S5
gene id	gene name	gene description
gene2672	-	MULTISPECIES: FAD-binding oxidoreductase
gene1391	-	acyl-CoA dehydrogenase family protein
gene1392	acd	MULTISPECIES: acyl-CoA dehydrogenase family protein
gene2760	dsbA	thiol:disulfide interchange protein DsbA/DsbL
gene2077	-	MULTISPECIES: indolepyruvate ferredoxin oxidoreductase family protein
gene2385	mmsA	methylmalonate-semialdehyde dehydrogenase
gene0942	-	MULTISPECIES: 2-polyprenyl-3-methyl-6-methoxy-1,4-benzoquinone monooxygenase
gene3194	-	MULTISPECIES: catalase family protein
gene2663	acd	MULTISPECIES: acyl-CoA dehydrogenase
gene2662	-	MULTISPECIES: SDR family oxidoreductase
gene1935	-	MULTISPECIES: glutathione-dependent formaldehyde dehydrogenase
gene2100	-	MULTISPECIES: glucose 1-dehydrogenase
gene3410	gcd	PQQ-dependent sugar dehydrogenase
gene2647	-	MULTISPECIES: saccharopine dehydrogenase NADP-binding domain-containing protein
gene0766	trxA	MULTISPECIES: thioredoxin
gene0282	-	MULTISPECIES: aldehyde dehydrogenase family protein
gene3217	antC	anthranilate 1,2-dioxygenase electron transfer component AntC
gene2057	-	MULTISPECIES: acyl-CoA dehydrogenase family protein
gene1164	gabD	MULTISPECIES: NAD-dependent succinate-semialdehyde dehydrogenase
gene3296	-	MULTISPECIES: dioxygenase
gene1649	rutF	MULTISPECIES: flavin reductase
gene3459	-	MULTISPECIES: nitroreductase family protein
gene0256	icd	MULTISPECIES: NADP-dependent isocitrate dehydrogenase
gene2124	yghU	glutathione-dependent disulfide-bond oxidoreductase
gene1286	bdh	MULTISPECIES: 3-hydroxybutyrate dehydrogenase
gene0463	-	MULTISPECIES: DsbA family oxidoreductase
gene1321	butA	acetoin dehydrogenase
gene1711	trxC	MULTISPECIES: thioredoxin TrxC
gene1816	-	MULTISPECIES: NADH:flavin oxidoreductase/NADH oxidase
gene1799	phnB	VOC family protein
gene2356	-	MULTISPECIES: rubredoxin
gene1413	-	MULTISPECIES: nucleoside-diphosphate sugar epimerase
gene1795	gcd	quinoprotein glucose dehydrogenase
gene0322	-	MULTISPECIES: FAD-dependent oxidoreductase
gene2032	katE	catalase family peroxidase
gene2033	cybB	MULTISPECIES: cytochrome b
gene2636	-	Quinoprotein glucose dehydrogenase-B
gene1142	-	MULTISPECIES: NAD(P)H-dependent oxidoreductase
gene0410	fadE	MULTISPECIES: acyl-CoA dehydrogenase
gene1215	aceE	MULTISPECIES: pyruvate dehydrogenase (acetyl-transferring), homodimeric type
gene0251	ndh	MULTISPECIES: NAD(P)/FAD-dependent oxidoreductase
gene1780	-	MULTISPECIES: peroxiredoxin
gene0399	-	MULTISPECIES: superoxide dismutase
gene3154	gpx	MULTISPECIES: glutathione peroxidase
gene2024	ahpC	ahpC
gene2388	-	MULTISPECIES: acyl-CoA dehydrogenase family protein
gene3153	msrB	msrB
gene2386	mmsB	MULTISPECIES: 3-hydroxyisobutyrate dehydrogenase
gene1878	-	MULTISPECIES: NAD(P)H-dependent oxidoreductase
gene0329	-	MULTISPECIES: aromatic ring-hydroxylating dioxygenase subunit alpha
gene2145	cydB	MULTISPECIES: cytochrome d ubiquinol oxidase subunit II
gene2146	cydA	MULTISPECIES: cytochrome ubiquinol oxidase subunit I
gene0409	pcaC	MULTISPECIES: carboxymuconolactone decarboxylase family protein
gene0054	-	MULTISPECIES: nitroreductase family protein
gene2232	-	MULTISPECIES: NAD(P)/FAD-dependent oxidoreductase
gene2250	-	hypothetical protein
gene3215	antA	MULTISPECIES: anthranilate 1,2-dioxygenase large subunit
gene2654	cpo	chloroperoxidase precursor
gene2656	-	MULTISPECIES: coniferyl aldehyde dehydrogenase
gene2657	-	MULTISPECIES: NAD(P)H-quinone oxidoreductase
gene0331	rubB	MULTISPECIES: FAD-dependent oxidoreductase
gene0330	-	choline monooxygenase
gene2653	katE	MULTISPECIES: catalase
gene0965	nfnB	MULTISPECIES: oxygen-insensitive NAD(P)H nitroreductase
gene2554	-	MULTISPECIES: molybdopterin-dependent oxidoreductase
gene2646	-	MULTISPECIES: dihydrofolate reductase
gene2148	-	MULTISPECIES: monooxygenase
gene3383	-	MULTISPECIES: superoxide dismutase family protein
gene0345	-	MULTISPECIES: pirin family protein
gene1884	-	MULTISPECIES: zinc-binding dehydrogenase
gene2099	katE	MULTISPECIES: catalase HPII

## Sheet: Table S6
First Category	Second Category	DEG_down	DEG_up
Cellular Processes	Cell growth and death	0	3
Cellular Processes	Cellular community - prokaryotes	4	9
Cellular Processes	Transport and catabolism	0	6
Environmental Information Processing	Membrane transport	6	10
Environmental Information Processing	Signal transduction	4	22
Genetic Information Processing	Folding, sorting and degradation	3	6
Genetic Information Processing	Replication and repair	2	3
Genetic Information Processing	Translation	17	1
Human Diseases	Cancer: overview	1	5
Human Diseases	Cancer: specific types	0	5
Human Diseases	Cardiovascular disease	1	6
Human Diseases	Drug resistance: antimicrobial	2	2
Human Diseases	Drug resistance: antineoplastic	2	3
Human Diseases	Endocrine and metabolic disease	1	1
Human Diseases	Immune disease	0	1
Human Diseases	Infectious disease: bacterial	4	5
Human Diseases	Neurodegenerative disease	0	6
Metabolism	Amino acid metabolism	14	19
Metabolism	Biosynthesis of other secondary metabolites	4	2
Metabolism	Carbohydrate metabolism	8	26
Metabolism	Energy metabolism	4	11
Metabolism	Glycan biosynthesis and metabolism	3	1
Metabolism	Lipid metabolism	3	15
Metabolism	Metabolism of cofactors and vitamins	12	7
Metabolism	Metabolism of other amino acids	3	9
Metabolism	Metabolism of terpenoids and polyketides	1	2
Metabolism	Nucleotide metabolism	5	4
Metabolism	Xenobiotics biodegradation and metabolism	4	10
Organismal Systems	Aging	0	11
Organismal Systems	Endocrine system	1	4
Organismal Systems	Environmental adaptation	0	1
Organismal Systems	Excretory system	1	0
Organismal Systems	Immune system	0	2

## Sheet: Table S7
modProbes	Gene_name	Gene_description
gene0013	-	MULTISPECIES: DOMON-like domain-containing protein
gene0036	dgkA	MULTISPECIES: diacylglycerol kinase
gene0045	-	MULTISPECIES: transglycosylase SLT domain-containing protein
gene0148	recO	MULTISPECIES: DNA repair protein RecO
gene0174	-	MULTISPECIES: hypothetical protein
gene0257	-	MULTISPECIES: hypothetical protein
gene0281	ddc	MULTISPECIES: aspartate aminotransferase family protein
gene0289	pstB	phosphate ABC transporter ATP-binding protein
gene0376	folE	MULTISPECIES: GTP cyclohydrolase I FolE
gene0500	rimP	MULTISPECIES: ribosome maturation factor RimP
gene0750	-	MULTISPECIES: acyl-CoA synthetase
gene0768	accA	MULTISPECIES: acetyl-CoA carboxylase carboxyltransferase subunit alpha
gene0808	-	MULTISPECIES: DUF423 domain-containing protein
gene0927	-	MULTISPECIES: 3-hydroxyacyl-CoA dehydrogenase
gene0928	-	MULTISPECIES: acyl-CoA dehydrogenase family protein
gene0929	acs	AMP-binding enzyme
gene0933	folB	MULTISPECIES: dihydroneopterin aldolase
gene0953	metR	transcriptional regulator
gene0963	hfq	RNA chaperone Hfq
gene1035	-	MULTISPECIES: TetR/AcrR family transcriptional regulator
gene1154	ynfM	MULTISPECIES: MFS transporter
gene1159	-	FAD-dependent oxidoreductase
gene1160	-	FAD-dependent oxidoreductase
gene1281	pgpA	MULTISPECIES: phosphatidylglycerophosphatase A
gene1287	-	GntP family permease
gene1290	scoA	MULTISPECIES: CoA transferase subunit A
gene1291	scoB	MULTISPECIES: CoA transferase subunit B
gene1328	-	MULTISPECIES: iron-containing redox enzyme family protein
gene1398	-	MULTISPECIES: hypothetical protein
gene1430	exbD	biopolymer transport protein
gene1471	-	MULTISPECIES: septum formation protein Maf
gene1473	-	MULTISPECIES: TetR/AcrR family transcriptional regulator
gene1475	sstT	MULTISPECIES: serine/threonine transporter SstT
gene1520	-	MULTISPECIES: YfhL family 4Fe-4S dicluster ferredoxin
gene1542	pth	MULTISPECIES: aminoacyl-tRNA hydrolase
gene1552	fabD	MULTISPECIES: ACP S-malonyltransferase
gene1639	-	MULTISPECIES: hypothetical protein
gene1711	trxC	MULTISPECIES: thioredoxin TrxC
gene1717	-	hypothetical protein
gene1774	trpA	MULTISPECIES: tryptophan synthase subunit alpha
gene1782	-	hypothetical protein
gene1792	-	MULTISPECIES: AraC family transcriptional regulator ligand-binding domain-containing protein
gene1800	atoB	thiolase family protein
gene1801	fimT	MULTISPECIES: type II transport protein GspH
gene1835	dapE	MULTISPECIES: succinyl-diaminopimelate desuccinylase
gene1894	-	MULTISPECIES: lysophospholipid acyltransferase family protein
gene1938	-	hypothetical protein
gene1960	-	MULTISPECIES: DUF2147 domain-containing protein
gene1988	-	MULTISPECIES: hypothetical protein
gene1995	proC	MULTISPECIES: NAD(P)-binding domain-containing protein
gene1996	-	MULTISPECIES: hypothetical protein
gene2007	-	threonine efflux protein
gene2076	-	MULTISPECIES: thioesterase family protein
gene2077	-	MULTISPECIES: indolepyruvate ferredoxin oxidoreductase family protein
gene2079	hmgL	MULTISPECIES: hydroxymethylglutaryl-CoA lyase
gene2080	-	acetyl/propionyl/methylcrotonyl-CoA carboxylase subunit alpha
gene2082	-	MULTISPECIES: methylcrotonoyl-CoA carboxylase
gene2083	ivd	MULTISPECIES: isovaleryl-CoA dehydrogenase
gene2084	-	TetR/AcrR family transcriptional regulator
gene2085	-	MULTISPECIES: AMP-binding protein
gene2086	cmoA	class I SAM-dependent methyltransferase
gene2181	-	DEAD/DEAH box helicase
gene2358	-	MULTISPECIES: esterase
gene2590	fabZ	MULTISPECIES: 3-hydroxyacyl-ACP dehydratase FabZ
gene2591	lpxA	MULTISPECIES: acyl-ACP--UDP-N-acetylglucosamine O-acyltransferase
gene2633	-	MULTISPECIES: amidohydrolase
gene2859	-	MULTISPECIES: cell division protein ZapA
gene2865	hutG	formimidoylglutamase
gene2866	hutI	MULTISPECIES: imidazolonepropionase
gene2867	hutT	MULTISPECIES: amino acid permease
gene2868	hutH	MULTISPECIES: histidine ammonia-lyase
gene2869	hutU	MULTISPECIES: urocanate hydratase
gene3014	rpoD	MULTISPECIES: RNA polymerase sigma factor RpoD
gene3016	lipB	MULTISPECIES: lipoyl(octanoyl) transferase LipB
gene3065	rnpA	RNase P protein component
gene3066	-	MULTISPECIES: membrane protein insertion efficiency factor YidD
gene3175	gst	MULTISPECIES: glutathione S-transferase
gene3295	rlmH	MULTISPECIES: 23S rRNA (pseudouridine(1915)-N(3))-methyltransferase RlmH
gene3372	-	MULTISPECIES: YfiR family protein
gene3376	-	MULTISPECIES: hypothetical protein
gene3398	-	MULTISPECIES: hypothetical protein
gene3448	map	type I methionyl aminopeptidase
gene3513	arsB	MULTISPECIES: ACR3 family arsenite efflux transporter
gene3514	arsR	MULTISPECIES: metalloregulator ArsR/SmtB family transcription factor
gene3515	arsC	MULTISPECIES: arsenate reductase (glutaredoxin)
gene3547	blaOXA-23	beta-lactamase OXA-23
gene3548	-	ATP-binding protein
gene3549	-	MULTISPECIES: hypothetical protein
gene3551	-	putative YeeC protein
gene3552	-	MULTISPECIES: hypothetical protein
gene3553	-	MULTISPECIES: hypothetical protein
gene3610	-	hypothetical protein
gene3632	-	hypothetical protein
gene3679	-	MULTISPECIES: hypothetical protein
gene3698	-	hypothetical protein
gene3701	-	hypothetical protein

## Sheet: Table S8
modProbes	Gene_name	Gene_description
gene0006	ybaZ	MGMT family protein
gene0007	-	MULTISPECIES: universal stress protein
gene0012	-	MULTISPECIES: hypothetical protein
gene0031	-	MULTISPECIES: NAD(+)/NADH kinase
gene0048	-	hypothetical protein
gene0083	-	MULTISPECIES: hypothetical protein
gene0104	-	hypothetical protein
gene0260	-	MULTISPECIES: LysR family transcriptional regulator
gene0279	-	MULTISPECIES: SIMPL domain-containing protein
gene0424	-	MULTISPECIES: DUF962 domain-containing protein
gene0454	-	MULTISPECIES: hypothetical protein
gene0459	-	Putative uncharacterized protein
gene0464	-	hypothetical protein
gene0527	cbpM	MULTISPECIES: MerR family transcriptional regulator
gene0528	cbpA	MULTISPECIES: DnaJ domain-containing protein
gene0530	hslO	MULTISPECIES: Hsp33 family molecular chaperone HslO
gene0536	-	MULTISPECIES: tRNA-binding protein
gene0539	tusA	MULTISPECIES: sulfurtransferase TusA
gene0546	-	DNA gyrase inhibitor YacG
gene0661	-	glycosyltransferase, group 1 family protein
gene0662	bcrC	MULTISPECIES: phosphatase PAP2 family protein
gene0663	-	MULTISPECIES: Fe-S cluster assembly protein IscX
gene0752	infC	hypothetical protein
gene0766	trxA	MULTISPECIES: thioredoxin
gene0776	emrE	MULTISPECIES: multidrug efflux SMR transporter
gene0777	-	MULTISPECIES: YfhL family 4Fe-4S dicluster ferredoxin
gene0783	-	MULTISPECIES: MgtC/SapB family protein
gene0785	-	MULTISPECIES: NirD/YgiW/YdeI family stress tolerance protein
gene0800	-	MULTISPECIES: hypothetical protein
gene0801	pepD	MULTISPECIES: aminoacyl-histidine dipeptidase
gene0813	-	MULTISPECIES: hypothetical protein
gene0882	-	MULTISPECIES: hypothetical protein
gene0892	-	MULTISPECIES: hypothetical protein
gene0948	-	MULTISPECIES: hypothetical protein
gene0994	-	MULTISPECIES: hypothetical protein
gene1024	-	hypothetical protein
gene1040	lip	triacylglycerol lipase
gene1106	-	Sel1 repeat protein
gene1115	-	MULTISPECIES: GNAT family acetyltransferase
gene1150	-	MULTISPECIES: hypothetical protein
gene1157	-	MULTISPECIES: GFA family protein
gene1184	-	hypothetical protein
gene1188	-	MULTISPECIES: hypothetical protein
gene1273	-	hypothetical protein
gene1349	-	Uncharacterised protein
gene1446	queD	MULTISPECIES: 6-carboxytetrahydropterin synthase
gene1495	-	hypothetical protein
gene1497	fxsA	MULTISPECIES: FxsA family protein
gene1514	-	MULTISPECIES: hypothetical protein
gene1557	scpA	segregation/condensation protein A
gene1568	bfr	bacterioferritin
gene1586	-	MULTISPECIES: DUF2062 domain-containing protein
gene1588	mrp	MULTISPECIES: iron-sulfur cluster carrier protein ApbC
gene1589	-	MULTISPECIES: hypothetical protein
gene1591	-	hypothetical protein
gene1600	-	MULTISPECIES: hypothetical protein
gene1637	-	MULTISPECIES: hypothetical protein
gene1785	-	hypothetical protein
gene1821	-	MULTISPECIES: SRPBCC family protein
gene1985	-	MULTISPECIES: hypothetical protein
gene1997	cspA	MULTISPECIES: cold-shock protein
gene2010	-	MULTISPECIES: GFA family protein
gene2095	-	MULTISPECIES: hypothetical protein
gene2242	prlC	MULTISPECIES: M3 family metallopeptidase
gene2267	-	MULTISPECIES: DUF2789 domain-containing protein
gene2273	-	hypothetical protein
gene2304	-	MULTISPECIES: hypothetical protein
gene2337	-	MULTISPECIES: hypothetical protein
gene2372	-	hypothetical protein
gene2375	-	MULTISPECIES: nuclear transport factor 2 family protein
gene2380	alr	MULTISPECIES: alanine racemase
gene2569	-	MULTISPECIES: hypothetical protein
gene2597	-	MULTISPECIES: hypothetical protein
gene2646	-	MULTISPECIES: dihydrofolate reductase
gene2655	-	MULTISPECIES: acetoacetate decarboxylase family protein
gene2656	-	MULTISPECIES: coniferyl aldehyde dehydrogenase
gene2657	-	MULTISPECIES: NAD(P)H-quinone oxidoreductase
gene2666	-	MULTISPECIES: phosphotransferase family protein
gene2669	-	hypothetical protein
gene2696	-	MULTISPECIES: HD domain-containing protein
gene2823	-	MULTISPECIES: hypothetical protein
gene2863	eptA	phosphoethanolamine--lipid A transferase
gene2922	-	methionine/alanine import family NSS transporter small subunit
gene2968	-	hypothetical protein
gene3011	-	MULTISPECIES: hypothetical protein
gene3069	rcnR	hypothetical protein
gene3072	-	MULTISPECIES: GlsB/YeaQ/YmgE family stress response membrane protein
gene3091	-	MULTISPECIES: nucleotide exchange factor GrpE
gene3124	bamE	MULTISPECIES: outer membrane protein assembly factor BamE
gene3155	-	MULTISPECIES: AraC family transcriptional regulator
gene3195	-	hypothetical protein
gene3199	-	hypothetical protein
gene3208	-	MULTISPECIES: transcriptional repressor
gene3284	-	MULTISPECIES: DUF2726 domain-containing protein
gene3316	aceA	MULTISPECIES: isocitrate lyase
gene3404	-	hypothetical protein
gene3409	-	universal stress family protein
gene3457	-	MULTISPECIES: hypothetical protein
gene3458	ftsY	MULTISPECIES: signal recognition particle-docking protein FtsY
gene3478	-	Putative helix-turn-helix protein, YlxM / p13 like protein
gene3486	-	MULTISPECIES: hypothetical protein
gene3544	-	Arc family DNA-binding protein
gene3572	soxR	redox-sensitive transcriptional activator SoxR
gene3578	-	hypothetical protein
gene3611	-	MULTISPECIES: hypothetical protein
gene3633	-	hypothetical protein
gene3690	ata	vesicle transport v-SNARE family protein
